# Supplementary material for: Effect of age and isolated systolic or diastolic hypertension on target organ damage in non-dialysis patients with chronic kidney disease
Source: publisher site journal article supplement (doi:10.18632/aging.202609), 2021-02-22
Supplement: Supplementary file [file aging-v13i4-202609-supplementary-material-SD1.pdf]

## SUPPLEMENTARY TABLE

Supplementary Table 1. Univariate linear regression analysis of age and Log (albumin creatinine ratio) (ACR) in CKD patients with different etiologies.

|                                   | Age (per 1 year)      |                | Age (0= age<60year, 1= age≥ 60year) |                |
|-----------------------------------|-----------------------|----------------|-------------------------------------|----------------|
|                                   | Beta coefficients     | <i>P</i> value | Beta coefficients                   | <i>P</i> value |
| Primary glomerulonephritis (1059) | 0.001(-0.002~0.003)   | 0.485          | 0.115(0.017~0.213)                  | 0.022          |
| Diabetic nephropathy (252)        | -0.006(-0.014~0.002)  | 0.149          | -0.190(-0.364~-0.016)               | 0.032          |
| Hypertensive nephropathy (124)    | -0.012(-0.024~0.001)  | 0.060          | -0.275(-0.573~0.023)                | 0.070          |
| Other causes (574)                | -0.009(-0.015~-0.003) | 0.003          | -0.002(-0.202~0.199)                | 0.988          |
